# Supplementary material
Source: PubMed Central journal article supplement (PMC8021390)
Supplement: NIHMS1674655-supplement-1.pdf [file NIHMS1674655-supplement-1.pdf]

**Supplemental Table 1: Hypertension incidence by baseline demographic and health characteristics**

|                                                    | Without hypertension, n=1250 | With hypertension, n=203 |         |
|----------------------------------------------------|------------------------------|--------------------------|---------|
|                                                    | n (%) or mean (SD)           | n (%) or mean (SD)       | p-value |
| <b>Sex</b>                                         |                              |                          | 0.0080  |
| Female                                             | 816 (65.3 %)                 | 113 (55.7%)              |         |
| Male                                               | 434 (34.7 %)                 | 90 (44.3 %)              |         |
| <b>Age, years</b>                                  | 31.52 (12.87)                | 41.12 (14.89)            | <0.0001 |
| <b>Region</b>                                      |                              |                          | 0.2330  |
| Arizona                                            | 360 (28.8 %)                 | 48 (23.6%)               |         |
| Oklahoma                                           | 466 (37.3 %)                 | 76 (37.4%)               |         |
| North and South Dakota                             | 424 (33.9 %)                 | 79 (38.9%)               |         |
| <b>Education</b>                                   |                              |                          | 0.4660  |
| Less than high school                              | 79 (6.3 %)                   | 12 (5.9%)                |         |
| Some high school                                   | 399 (31.9 %)                 | 55 (27.1%)               |         |
| High school diploma                                | 426 (34.1 %)                 | 71 (35.0%)               |         |
| Some college                                       | 346 (27.7 %)                 | 65 (32.0%)               |         |
| <b>Smoking</b>                                     |                              |                          | 0.0350  |
| Never                                              | 552 (44.2 %)                 | 70 (34.5%)               |         |
| Former                                             | 234 (18.7 %)                 | 45 (22.2%)               |         |
| Current                                            | 464 (37.1 %)                 | 88 (43.3%)               |         |
| <b>Alcohol</b>                                     |                              |                          | 0.0120  |
| Never                                              | 142 (11.4 %)                 | 15 (7.4 %)               |         |
| Former                                             | 294 (23.5 %)                 | 66 (32.5 %)              |         |
| Current                                            | 814 (65.1 %)                 | 122 (60.1 %)             |         |
| <b>Diabetes status</b>                             |                              |                          | 0.2370  |
| Yes                                                | 46 (3.7 %)                   | 8 (3.9%)                 |         |
| No                                                 | 1204 (96.3%)                 | 195 (96.1%)              |         |
| <b>Fasting glucose</b>                             | 92.06 (9.69)                 | 94.94 (10.39)            | 0.0001  |
| <b>BMI</b>                                         | 30.57 (7.54)                 | 32.30 (7.42)             | 0.0020  |
| <b>Urine creatinine</b>                            | 1.60 (0.95)                  | 1.52 (0.89)              | 0.2210  |
| <b>Blood pressure</b>                              |                              |                          |         |
| Systolic                                           | 114.19 (10.19)               | 123.70 (9.39)            | <0.0001 |
| Diastolic                                          | 72.69 (8.73)                 | 78.32 (8.19)             | <0.0001 |
| <b>Pedometer steps</b>                             | 6385.02 (3982.63)            | 6057.65 (4089.88)        | 0.2790  |
| <b>Estimated glomerular filtration rate (eGFR)</b> | 98.18 (21.68)                | 90.91 (20.79)            | <0.0001 |

**Supplemental Table 2: Measures of arsenic toxicokinetics, according to participant demographics**

| Percentile             | Percent inorganic Arsenic |       |       | Percent MMA |       |       | Percent DMA |       |       | Total (N) |
|------------------------|---------------------------|-------|-------|-------------|-------|-------|-------------|-------|-------|-----------|
|                        | 25                        | 50    | 75    | 25          | 50    | 75    | 25          | 50    | 75    |           |
| <b>Sex</b>             |                           |       |       |             |       |       |             |       |       |           |
| Female                 | 5.69                      | 8.80  | 12.70 | 9.79        | 12.97 | 16.53 | 71.12       | 77.24 | 83.61 | 1175      |
| Male                   | 7.84                      | 11.36 | 16.00 | 12.40       | 15.82 | 19.40 | 65.67       | 72.07 | 78.64 | 735       |
| <b>Age</b>             |                           |       |       |             |       |       |             |       |       |           |
| <18                    | 7.70                      | 11.37 | 15.90 | 12.78       | 16.11 | 19.93 | 64.54       | 72.17 | 77.92 | 225       |
| 18-<35                 | 7.39                      | 10.97 | 15.42 | 11.08       | 14.40 | 18.15 | 67.00       | 74.06 | 79.64 | 741       |
| 35-<50                 | 6.20                      | 9.43  | 13.44 | 10.11       | 13.21 | 16.98 | 69.25       | 76.64 | 83.07 | 596       |
| >=50                   | 4.34                      | 7.08  | 10.96 | 9.48        | 13.08 | 16.98 | 73.04       | 79.47 | 84.56 | 348       |
| <b>Region</b>          |                           |       |       |             |       |       |             |       |       |           |
| Arizona                | 7.80                      | 11.20 | 15.83 | 9.76        | 12.84 | 16.20 | 68.44       | 74.78 | 80.82 | 511       |
| Oklahoma               | 5.47                      | 8.30  | 12.26 | 10.42       | 13.93 | 18.08 | 70.34       | 76.77 | 83.28 | 713       |
| Dakotas                | 6.47                      | 10.16 | 14.81 | 11.52       | 14.87 | 18.72 | 67.00       | 74.40 | 80.85 | 686       |
| <b>Education</b>       |                           |       |       |             |       |       |             |       |       |           |
| Less than high school  | 6.94                      | 11.04 | 14.26 | 10.03       | 14.06 | 18.18 | 68.40       | 74.62 | 80.11 | 114       |
| Some high school       | 6.90                      | 10.87 | 15.61 | 11.04       | 14.41 | 18.36 | 66.83       | 74.19 | 80.57 | 547       |
| High school diploma    | 6.61                      | 9.98  | 14.08 | 10.79       | 14.14 | 17.99 | 68.37       | 74.76 | 81.35 | 674       |
| Some college           | 5.43                      | 8.38  | 12.30 | 10.00       | 13.18 | 16.96 | 70.61       | 77.57 | 83.67 | 575       |
| <b>Smoking status</b>  |                           |       |       |             |       |       |             |       |       |           |
| Never                  | 6.12                      | 9.59  | 13.58 | 10.86       | 14.12 | 18.04 | 68.62       | 75.63 | 81.77 | 825       |
| Former                 | 5.83                      | 9.12  | 14.09 | 9.67        | 13.02 | 16.98 | 69.32       | 76.67 | 83.78 | 393       |
| Current                | 6.74                      | 10.37 | 14.61 | 10.70       | 14.22 | 18.40 | 67.75       | 74.36 | 80.84 | 692       |
| <b>Alcohol</b>         |                           |       |       |             |       |       |             |       |       |           |
| Never                  | 5.73                      | 10.19 | 14.44 | 11.55       | 14.63 | 18.54 | 66.36       | 74.37 | 82.19 | 205       |
| Former                 | 5.75                      | 8.80  | 12.41 | 10.00       | 13.78 | 17.28 | 70.79       | 76.96 | 83.33 | 489       |
| Current                | 6.78                      | 10.34 | 14.63 | 10.67       | 13.94 | 17.98 | 67.78       | 74.68 | 81.05 | 1216      |
| <b>Diabetes status</b> |                           |       |       |             |       |       |             |       |       |           |
| Yes                    | 6.14                      | 9.38  | 13.44 | 10.65       | 12.72 | 15.52 | 7.09        | 7.70  | 8.32  | 78        |
| No                     | 6.38                      | 9.89  | 14.10 | 10.53       | 13.99 | 17.95 | 68.18       | 75.24 | 81.79 | 1832      |
| <b>Body Mass Index</b> |                           |       |       |             |       |       |             |       |       |           |
| <25                    | 7.68                      | 11.56 | 16.67 | 12.98       | 17.05 | 20.89 | 63.30       | 71.11 | 76.92 | 390       |
| 25-<30                 | 6.06                      | 9.79  | 14.22 | 10.58       | 14.75 | 18.25 | 67.63       | 74.92 | 81.52 | 514       |
| ≥30                    | 6.42                      | 10.28 | 14.82 | 11.90       | 13.72 | 17.23 | 68.55       | 75.39 | 80.11 | 1006      |

**Supplemental Table 3: Blood pressure measures by demographic characteristics at baseline (mm Hg)**

| Percentile             | Systolic blood pressure |       |       | Diastolic blood pressure |      |      | Total (n) |
|------------------------|-------------------------|-------|-------|--------------------------|------|------|-----------|
|                        | 25                      | 50    | 75    | 25                       | 50   | 75   |           |
| <b>Sex</b>             |                         |       |       |                          |      |      |           |
| Female                 | 108                     | 115   | 126   | 68                       | 74   | 81   | 1175      |
| Male                   | 114                     | 123   | 133   | 71                       | 79   | 86   | 735       |
| <b>Age</b>             |                         |       |       |                          |      |      |           |
| <18                    | 107                     | 113   | 119   | 61                       | 69   | 76   | 225       |
| 18-35                  | 108                     | 115   | 125   | 68                       | 75   | 81   | 741       |
| 35-50                  | 111                     | 120   | 131   | 73                       | 79   | 86   | 596       |
| >50                    | 120                     | 131   | 140   | 71                       | 78   | 84   | 348       |
| <b>Region</b>          |                         |       |       |                          |      |      |           |
| Arizona                | 109                     | 116   | 126   | 69                       | 76   | 83   | 511       |
| Oklahoma               | 113                     | 123   | 134   | 69                       | 77   | 85   | 713       |
| Dakotas                | 109                     | 117   | 127   | 69                       | 75   | 82   | 686       |
| <b>Education</b>       |                         |       |       |                          |      |      |           |
| Less than high school  | 107                     | 116   | 129   | 68                       | 75.5 | 83   | 114       |
| Some high school       | 108                     | 115   | 126   | 66                       | 73   | 80   | 547       |
| High school diploma    | 112                     | 121   | 131   | 71                       | 77   | 84   | 674       |
| Some college           | 111                     | 120   | 132   | 71                       | 77   | 85   | 575       |
| <b>Smoking status</b>  |                         |       |       |                          |      |      |           |
| Never                  | 109                     | 117   | 128   | 68                       | 76   | 83   | 825       |
| Former                 | 112                     | 122   | 132   | 70                       | 78   | 85   | 393       |
| Current                | 110                     | 118   | 129   | 69                       | 76   | 83   | 692       |
| <b>Alcohol</b>         |                         |       |       |                          |      |      |           |
| Never                  | 108                     | 116   | 128   | 65                       | 72   | 80   | 205       |
| Former                 | 111                     | 120   | 131   | 70                       | 77   | 83   | 489       |
| Current                | 110                     | 118   | 129   | 70                       | 77   | 84   | 1216      |
| <b>Diabetes status</b> |                         |       |       |                          |      |      |           |
| Yes                    | 111.5                   | 124.5 | 133.5 | 68.5                     | 77.5 | 85.5 | 78        |
| No                     | 110                     | 118   | 129   | 69                       | 76   | 83   | 1832      |
| <b>Body Mass Index</b> |                         |       |       |                          |      |      |           |
| 18-<25                 | 106                     | 112   | 122   | 64                       | 71   | 78   | 376       |
| 25-<30                 | 110                     | 119   | 130   | 71                       | 76   | 84   | 514       |
| ≥30                    | 112                     | 121   | 131   | 71                       | 78   | 85   | 1006      |

**Supplemental Table 4. Changes in systolic blood pressure by quartiles of inorganic and methylated arsenic exposure, stratified by study center.**

|                               | Model 1 |              | Model 2 |             | Model 4 |              | Model 5 |             |
|-------------------------------|---------|--------------|---------|-------------|---------|--------------|---------|-------------|
|                               | $\beta$ | 95% CI       | $\beta$ | 95% CI      | $\beta$ | 95% CI       | $\beta$ | 95% CI      |
| <b>Arizona</b>                |         |              |         |             |         |              |         |             |
| <b>1</b>                      | 0.00    | Referent     | 0.00    | Referent    | 0.00    | Referent     | 0.00    | Referent    |
| <b>2</b>                      | 6.14    | 0.45, 11.83  | 4.98    | 0.01, 9.95  | 4.90    | 1.12, 8.69   | 4.88    | 0.12, 9.59  |
| <b>3</b>                      | 4.63    | -1.75, 11.01 | 2.94    | -2.06, 7.94 | 2.51    | -1.04, 6.06  | 3.01    | -1.72, 7.73 |
| <b>4</b>                      | 6.38    | -0.19, 12.96 | 4.67    | -0.20, 9.53 | 4.32    | 0.89, 7.76   | 4.33    | -0.32, 8.97 |
| <b>Oklahoma</b>               |         |              |         |             |         |              |         |             |
| <b>1</b>                      | 0.00    | Referent     | 0.00    | Referent    | 0.00    | Referent     | 0.00    | Referent    |
| <b>2</b>                      | 0.88    | -1.60, 3.36  | -1.81   | -3.83, 0.21 | -2.03   | -3.88, -0.17 | -1.80   | -3.87, 0.26 |
| <b>3</b>                      | 0.78    | -2.70, 4.25  | -0.88   | -3.85, 2.08 | -1.29   | -3.45, 0.86  | -0.97   | -4.17       |
| <b>4</b>                      | 2.96    | -1.29, 7.21  | -0.71   | -4.40, 2.99 | -1.37   | -4.30, 1.57  | -0.67   | -4.52, 3.18 |
| <b>North and South Dakota</b> |         |              |         |             |         |              |         |             |
| <b>1</b>                      | 0.00    | Referent     | 0.00    | Referent    | 0.00    | Referent     | 0.00    | Referent    |
| <b>2</b>                      | -3.31   | -6.18, -0.43 | -2.46   | -6.15, 1.23 | -2.92   | -6.22, 0.38  | -2.46   | -6.15, 1.23 |
| <b>3</b>                      | 0.65    | -2.64, 3.94  | -0.10   | -3.74, 3.54 | -0.63   | -3.53, 2.26  | -0.13   | -3.80, 3.53 |
| <b>4</b>                      | -0.13   | -3.69, 3.43  | 0.95    | -3.24, 5.14 | 0.30    | -3.06, 3.65  | 1.02    | -3.11, 5.14 |

Models are generalized estimating equation linear regression models for systolic blood pressure, with exchangeable covariance conditional on family membership.

Model 1: Adjusted only for arsenobetaine and log urine creatinine

Model 2: Further adjusted for age, sex, education, drinking status, smoking status, BMI, kidney function, diabetes status, physical activity, diet index, total daily caloric intake

Model 4: Model 2, without adjustment for urine creatinine

Model 5: Model 2, without adjustment for arsenobetaine

**Supplemental Table 5. Changes in diastolic blood pressure by quartiles of inorganic and methylated arsenic exposure, stratified by study center.**

|                               | Model 1 |              | Model 2 |              | Model 4 |              | Model 5 |              |
|-------------------------------|---------|--------------|---------|--------------|---------|--------------|---------|--------------|
|                               | $\beta$ | 95% CI       |
| <b>Arizona</b>                |         |              |         |              |         |              |         |              |
| <b>1</b>                      | 0.00    | Referent     | 0.00    | Referent     | 0.00    | Referent     | 0.00    | Referent     |
| <b>2</b>                      | 3.76    | -1.26, 8.77  | 3.12    | -0.74, 6.97  | 3.02    | -0.21, 6.25  | 3.00    | -0.82, 6.81  |
| <b>3</b>                      | 2.79    | -2.26, 7.83  | 2.43    | -1.73, 6.59  | 2.01    | -1.67, 5.68  | 2.45    | -1.61, 6.51  |
| <b>4</b>                      | 4.98    | 0.09, 9.86   | 4.65    | 0.89, 8.41   | 4.32    | 1.37, 7.27   | 4.37    | 0.66, 8.08   |
| <b>Oklahoma</b>               |         |              |         |              |         |              |         |              |
| <b>1</b>                      | 0.00    | Referent     | 0.00    | Referent     | 0.00    | Referent     | 0.00    | Referent     |
| <b>2</b>                      | -0.83   | -3.23, 1.56  | -2.08   | -4.41, 0.25  | -1.91   | -4.11, 0.29  | -2.06   | -4.33, 0.21  |
| <b>3</b>                      | 0.97    | -1.70, 3.65  | -0.35   | -2.84, 2.14  | 0.05    | -2.07, 2.16  | -0.34   | -2.82, 2.13  |
| <b>4</b>                      | 1.00    | -1.87, 3.87  | -0.50   | -3.47, 2.48  | 0.21    | -2.24, 2.65  | -0.40   | -3.26, 2.47  |
| <b>North and South Dakota</b> |         |              |         |              |         |              |         |              |
| <b>1</b>                      | 0.00    | Referent     | 0.00    | Referent     | 0.00    | Referent     | 0.00    | Referent     |
| <b>2</b>                      | -4.28   | -6.08, -2.48 | -3.59   | -5.49, -1.69 | -3.24   | -4.99, -1.50 | -3.59   | -5.48, -1.70 |
| <b>3</b>                      | -0.74   | -2.89, 1.42  | -0.61   | -2.84, 1.61  | 0.03    | -1.83, 1.90  | -0.60   | -2.85, 1.65  |
| <b>4</b>                      | -0.36   | -2.67, 1.94  | 0.87    | -1.84, 3.59  | 1.79    | -0.39, 3.97  | 0.91    | -1.83, 3.66  |

Models are generalized estimating equation linear regression models for diastolic blood pressure, with exchangeable covariance conditional on family membership.

Model 1: Adjusted only for arsenobetaine and log urine creatinine

Model 2: Further adjusted for age, sex, education, drinking status, smoking status, BMI, kidney function, diabetes status, physical activity, diet index, total daily caloric intake

Model 4: Model 2, without adjustment for urine creatinine

Model 5: Model 2, without adjustment for arsenobetaine

**Supplemental Table 6: Incident hypertension risk ratios by quartiles of inorganic and methylated arsenic, stratified by study center**

|                               | Model 1 |            | Model 2 |            | Model 4 |            | Model 5 |            |
|-------------------------------|---------|------------|---------|------------|---------|------------|---------|------------|
|                               | RR      | 95% CI     |
| <b>Arizona</b>                |         |            |         |            |         |            |         |            |
| <b>1</b>                      | 1.00    | Referent   | 1.00    | Referent   | 1.00    | Referent   | 1.00    | Referent   |
| <b>2</b>                      | 2.79    | 1.12, 6.98 | 2.53    | 1.08, 5.93 | 3.05    | 1.20, 7.78 | 2.53    | 1.06, 6.06 |
| <b>3</b>                      | 1.00    | 0.30, 3.30 | 0.71    | 0.20, 2.62 | 0.87    | 0.26, 2.90 | 0.72    | 0.19, 2.72 |
| <b>4</b>                      | 1.85    | 0.59, 5.81 | 1.25    | 0.34, 4.57 | 1.56    | 0.50, 4.90 | 1.23    | 0.34, 4.54 |
| <b>Oklahoma</b>               |         |            |         |            |         |            |         |            |
| <b>1</b>                      | 1.00    | Referent   | 1.00    | Referent   | 1.00    | Referent   | 1.00    | Referent   |
| <b>2</b>                      | 1.13    | 0.64, 1.98 | 1.38    | 0.72, 2.66 | 1.47    | 0.80, 2.71 | 1.37    | 0.70, 2.67 |
| <b>3</b>                      | 0.97    | 0.54, 1.77 | 0.81    | 0.53, 1.23 | 0.92    | 0.63, 1.34 | 0.83    | 0.52, 1.34 |
| <b>4</b>                      | 0.92    | 0.65, 1.30 | 1.06    | 0.65, 1.73 | 1.22    | 0.78, 1.91 | 1.11    | 0.64, 1.92 |
| <b>North and South Dakota</b> |         |            |         |            |         |            |         |            |
| <b>1</b>                      | 1.00    | Referent   | 1.00    | Referent   | 1.00    | Referent   | 1.00    | Referent   |
| <b>2</b>                      | 1.03    | 0.59, 1.79 | 1.12    | 0.65, 1.94 | 1.25    | 0.70, 2.23 | 1.10    | 0.63, 1.93 |
| <b>3</b>                      | 1.61    | 0.82, 3.15 | 1.62    | 0.85, 3.09 | 1.84    | 0.98, 3.44 | 1.53    | 0.80, 2.90 |
| <b>4</b>                      | 1.20    | 0.48, 3.02 | 1.18    | 0.40, 3.47 | 1.27    | 0.49, 3.34 | 1.08    | 0.38, 3.06 |

Models are generalized estimating equation Poisson regression models for incident hypertension (defined as SBP  $\geq$ 140 mm Hg, DBP  $\geq$ 90 mm Hg, or taking hypertension medication), with exchangeable covariance conditional on family membership

Model 1: Adjusted only for arsenobetaine and log urine creatinine

Model 2: Further adjusted for age, sex, education, drinking status, smoking status, BMI, kidney function, diabetes status, physical activity, diet index, total daily caloric intake

Model 4: Model 2, without adjustment for urine creatinine

Model 5: Model 2, without adjustment for arsenobetaine

**Supplemental Table 7: Changes in systolic and diastolic blood pressure by quartiles of inorganic and methylated arsenic, stratified by baseline diabetes status**

|                                                                          | Model 1 |              | Model 3 |              | Model 4 |              | Model 5 |                |
|--------------------------------------------------------------------------|---------|--------------|---------|--------------|---------|--------------|---------|----------------|
|                                                                          | $\beta$ | 95% CI         |
| <b>Systolic blood pressure among those with diabetes at baseline</b>     |         |              |         |              |         |              |         |                |
| <b>1</b>                                                                 | 0.00    | Referent     | 0.00    | Referent     | 0.00    | Referent     | 0.00    | Referent       |
| <b>2</b>                                                                 | 2.43    | -5.90, 10.75 | 15.06   | -0.72, 30.85 | 1.34    | -9.90, 12.59 | -26.57  | -43.83, -9.30  |
| <b>3</b>                                                                 | 3.21    | -7.52, 13.95 | 35.18   | 17.69, 52.68 | -2.08   | -9.60, 5.44  | -31.72  | -48.59, -14.85 |
| <b>4</b>                                                                 | -3.46   | -15.13, 8.22 | 10.43   | -6.75, 27.61 | 6.08    | -5.24, 17.41 | -42.60  | -74.02, -11.18 |
| <b>Systolic blood pressure among those without diabetes at baseline</b>  |         |              |         |              |         |              |         |                |
| <b>1</b>                                                                 | 0.00    | Referent     | 0.00    | Referent     | 0.00    | Referent     | 0.00    | Referent       |
| <b>2</b>                                                                 | -1.07   | -2.96, 0.82  | -0.71   | -2.40, 0.98  | -0.84   | -2.43, 0.74  | -0.75   | -2.44, 0.93    |
| <b>3</b>                                                                 | -1.08   | -3.34, 1.19  | -0.64   | -2.60, 1.33  | -0.79   | -2.35, 0.78  | -0.76   | -2.73, 1.22    |
| <b>4</b>                                                                 | -0.55   | -2.99, 1.88  | 0.20    | -1.98, 2.38  | -0.01   | -1.75, 1.73  | -0.01   | -2.21, 2.18    |
| <b>Diastolic blood pressure among those with diabetes at baseline</b>    |         |              |         |              |         |              |         |                |
| <b>1</b>                                                                 | 0.00    | Referent     | 0.00    | Referent     | 0.00    | Referent     | 0.00    | Referent       |
| <b>2</b>                                                                 | -3.12   | -9.28, 3.04  | 3.62    | -4.01, 11.26 | -0.78   | -9.17, 7.60  | 4.00    | -3.94, 11.94   |
| <b>3</b>                                                                 | 0.90    | -5.11, 6.92  | 6.91    | -0.71, 14.53 | 2.60    | -4.35, 9.56  | 6.82    | -1.25, 14.89   |
| <b>4</b>                                                                 | 1.75    | -5.79, 9.29  | 19.09   | 10.57, 27.62 | 16.23   | 8.23, 24.24  | 20.78   | 11.72, 29.84   |
| <b>Diastolic blood pressure among those without diabetes at baseline</b> |         |              |         |              |         |              |         |                |
| <b>1</b>                                                                 | 0.00    | Referent     | 0.00    | Referent     | 0.00    | Referent     | 0.00    | Referent       |
| <b>2</b>                                                                 | -1.41   | -3.04, 0.23  | -1.41   | -2.81, -0.01 | -1.24   | -2.55, 0.07  | -1.48   | -2.86, -0.10   |
| <b>3</b>                                                                 | 0.14    | -1.60, 1.87  | -0.21   | -1.73, 1.32  | 0.19    | -1.09, 1.48  | -0.29   | -1.83, 1.25    |
| <b>4</b>                                                                 | 0.66    | -1.06, 2.39  | 0.64    | -1.10, 2.38  | 1.34    | -0.02, 2.69  | 0.49    | -1.25, 2.23    |

Models are generalized estimating equation linear regression models for systolic blood pressure, with exchangeable covariance conditional on family membership.

Model 1: Adjusted only for arsenobetaine and log urine creatinine

Model 3: Further adjusted for age, sex, education, drinking status, smoking status, BMI, kidney function, physical activity, diet index, total daily caloric intake, and site

Model 4: Model 3, without adjustment for urine creatinine

Model 5: Model 3, without adjustment for arsenobetaine
